# Supplementary material for: Atypical teratoid/rhabdoid tumors (ATRTs) with SMARCA4 mutation are molecularly distinct from SMARCB1-deficient cases
Source: PubMed Central journal article supplement (PMC7847432; doi:10.1007/s00401-020-02250-7), 2020-12-17
Supplement: 401_2020_2250_MOESM1_ESM.pdf [file 401_2020_2250_MOESM1_ESM.pdf]

## Title Page

### Title

Atypical teratoid/rhabdoid tumors (ATRTs) with *SMARCA4* mutation are molecularly distinct from *SMARCB1* deficient cases

### Authors

Dörthe Holdhof<sup>1,2,#</sup>, Pascal D. Johann<sup>3,4,5,#</sup>, Michael Spohn<sup>2</sup>, Michael Bockmayr<sup>1,2,6</sup>, Sepehr Safaei<sup>1,2,7</sup>, Piyush Joshi<sup>4,5</sup>, Julien Masliah-Planchon<sup>8</sup>, Ben Ho<sup>9</sup>, Mamy Andrianteranagna<sup>8,10</sup>, Franck Bourdeaut<sup>8,11</sup>, Annie Huang<sup>8</sup>, Marcel Kool<sup>4,5,12</sup>, Santhosh A. Upadhyaya<sup>13</sup>, Anne E Bendel<sup>14</sup>, Daniela Indenbirken<sup>15</sup>, William D. Foulkes<sup>16</sup>, Jonathan W. Bush<sup>17,18</sup>, David Creytens<sup>19</sup>, Uwe Kordes<sup>1</sup>, Michael C. Frühwald<sup>3</sup>, Martin Hasselblatt<sup>20</sup>, and Ulrich Schüller<sup>1,2,7</sup>

<sup>1</sup>Department of Pediatric Hematology and Oncology, University Medical Center Hamburg-Eppendorf, Germany

<sup>2</sup>Research Institute Children's Cancer Center Hamburg, Germany

<sup>3</sup>Paediatric and Adolescent Medicine, Swabian Childrens' Cancer Center Augsburg, Germany

<sup>4</sup>Hopp Children's Cancer Center (KiTZ), Heidelberg, Germany.

<sup>5</sup>Division of Pediatric Neurooncology, German Cancer Research Center (DKFZ) and German Cancer Research Consortium (DKTK), Heidelberg, Germany.

<sup>6</sup>Institute of Pathology, Charité - Universitätsmedizin Berlin, corporate member of Freie Universität Berlin, Humboldt-Universität zu Berlin and Berlin Institute of Health, Berlin, Germany.

<sup>7</sup>Institute of Neuropathology, University Medical Center Hamburg-Eppendorf, Germany

<sup>8</sup>INSERM U830, Laboratory of Translational Research in Pediatric Oncology, SIREDO Pediatric Oncology Center, Curie Institute, Paris, France.

<sup>9</sup>Division of Hematology & Oncology, Arthur and Sonia Labatt Brain Tumour Research Centre, The Hospital for Sick Children, Department of Paediatrics, University of Toronto, Toronto, ON, Canada

<sup>10</sup>INSERM U900, MINES ParisTech, PSL Research University, CBIO-Centre for Computational Biology, Curie Institute, Paris, France

<sup>11</sup>Departments of Genetics and of Oncopediatry and Young Adults, Curie Institute, Paris, France.

<sup>12</sup>Princess Máxima Center for Pediatric Oncology, Utrecht, the Netherlands

<sup>13</sup>Department of Oncology, St Jude Children's Research Hospital, Department of Pediatrics, University of Tennessee Health Sciences Center, Memphis, Tennessee, USA

<sup>14</sup>Children's Hospitals and Clinics of Minnesota, Minneapolis, MN, USA

<sup>15</sup>Heinrich-Pette Institute, Leibniz Institute for Experimental Virology, Hamburg, Germany

<sup>16</sup>Department of Human Genetics, McGill University, Montreal, QC, Canada

<sup>17</sup>Division of Anatomical Pathology, British Columbia Children's Hospital and Women's Hospital and Health Center, Vancouver, British Columbia, Canada.

<sup>18</sup>University of British Columbia, Vancouver, British Columbia, Canada.

<sup>19</sup>Department of Pathology, Ghent University Hospital, Ghent, Belgium.

<sup>20</sup>Institute of Neuropathology, University Hospital Münster, Germany

<sup>#</sup>These authors contributed equally to this work.

### Corresponding author:

Ulrich Schüller, MD

Research Institute Children's Cancer Center Hamburg

Martinistrasse 52, N63 (HPI), D-20251 Hamburg, Germany

Phone: +49-40-426051240

Fax: +49-40-741040350

E-mail: [u.schueller@uke.de](mailto:u.schueller@uke.de)

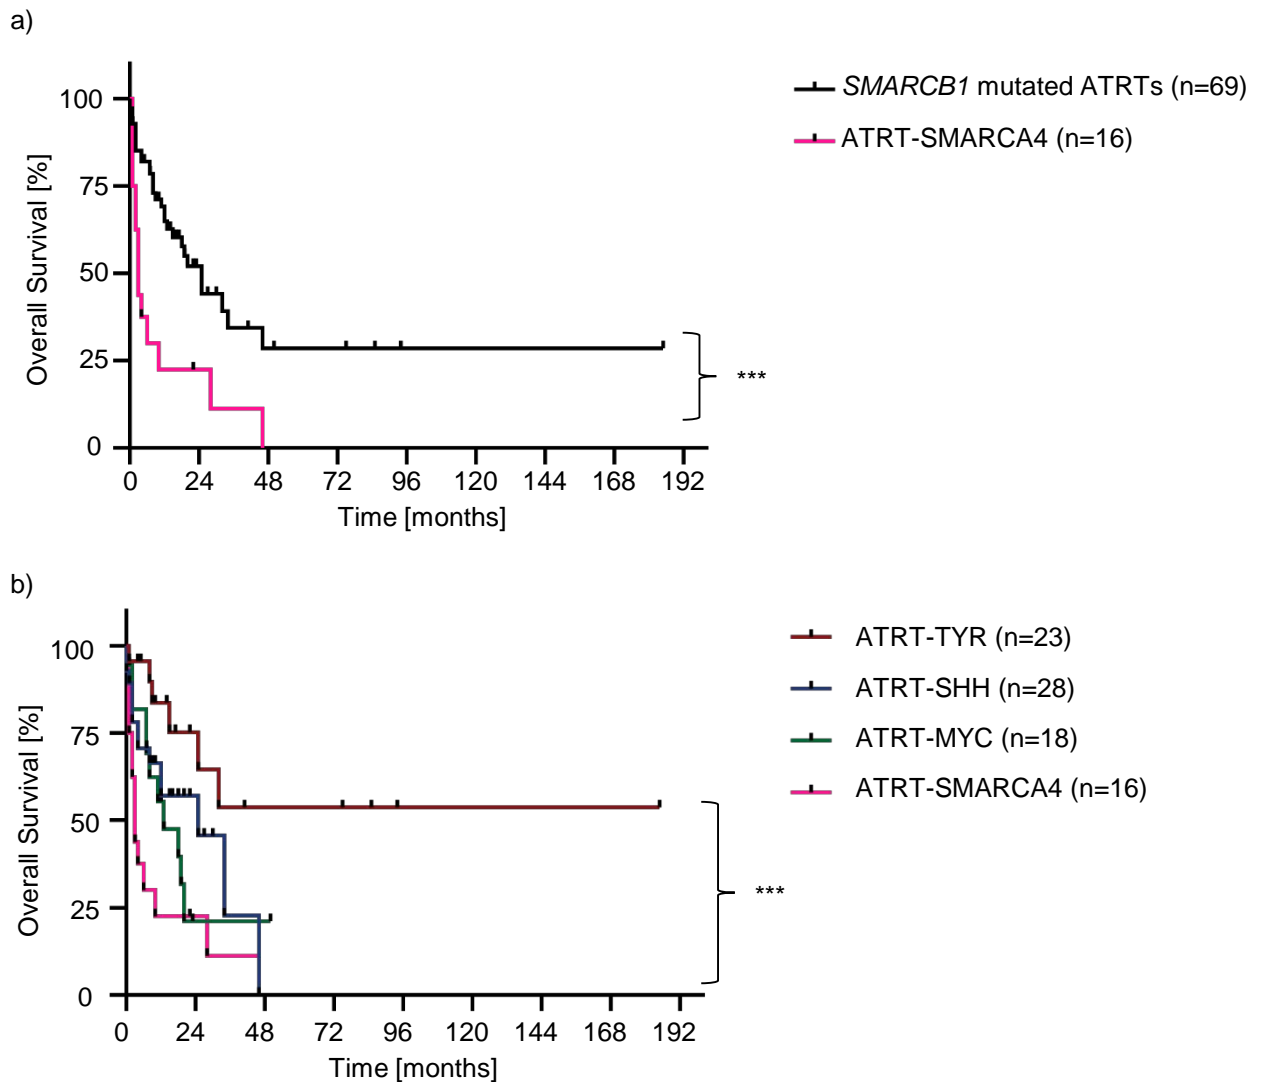

### Supplementary Fig. 1

Kaplan Meier analysis for comparison of *SMARCB1* (n=69) and *SMARCA4* mutated ATRTs (n=16) shows significantly less survival in the latter (a). Kaplan Meier analysis for comparison of ATRT-TYR (n=23), ATRT-SHH (n=28), ATRT-MYC (n=18) and ATRT-SMARCA4 (n=16) depicts significant differences across all subgroups (b). Significance is based on a Log-Rank test. \*\*\* $p < 0.001$ . Note that this analysis included 5 published cases, for which tumor material was not available [5, 37].

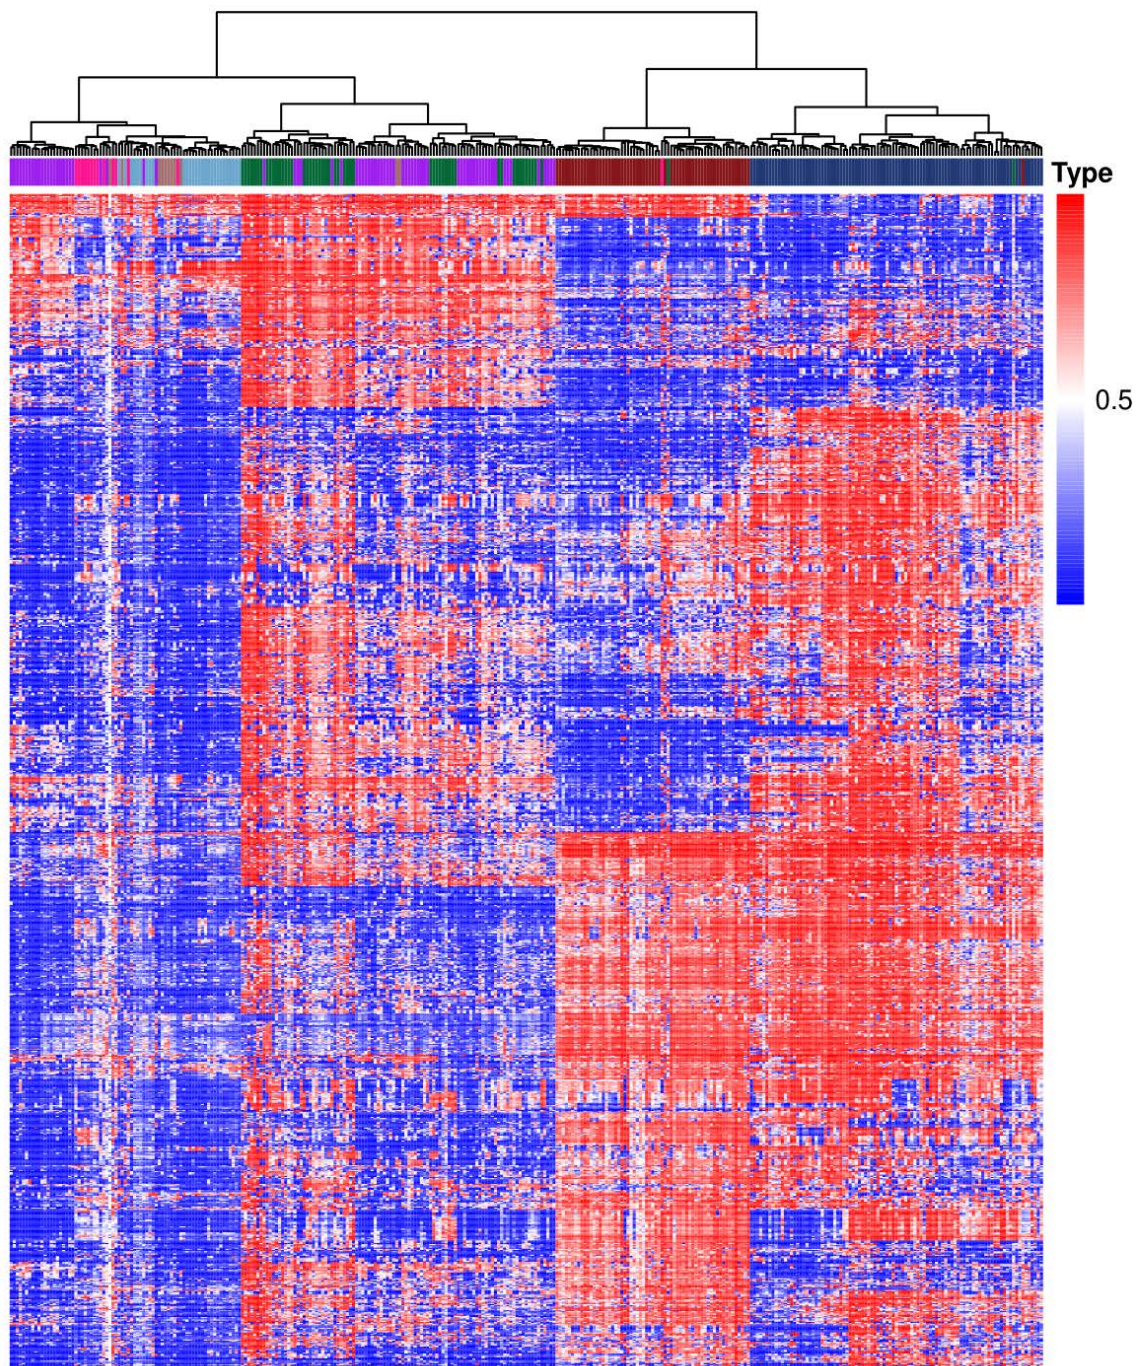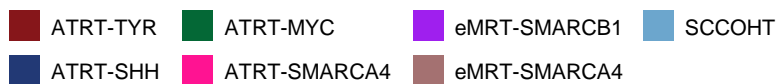

### Supplementary Fig. 2

Unsupervised hierarchical clustering of  $n=14$  ATRT-SMARCA4 (pink),  $n=11$  eMRT-SMARCA4 (brown),  $n=62$  ATRT-TYR (dark red),  $n=93$  ATRT-SHH (blue),  $n=53$  ATRT-MYC (dark green),  $n=74$  eMRT-SMARCB1 (purple), and  $n=28$  SCCOHTs (light blue) using the 1,000 most variant probes is shown. The level of DNA methylation is indicated by a color scale representing beta values.

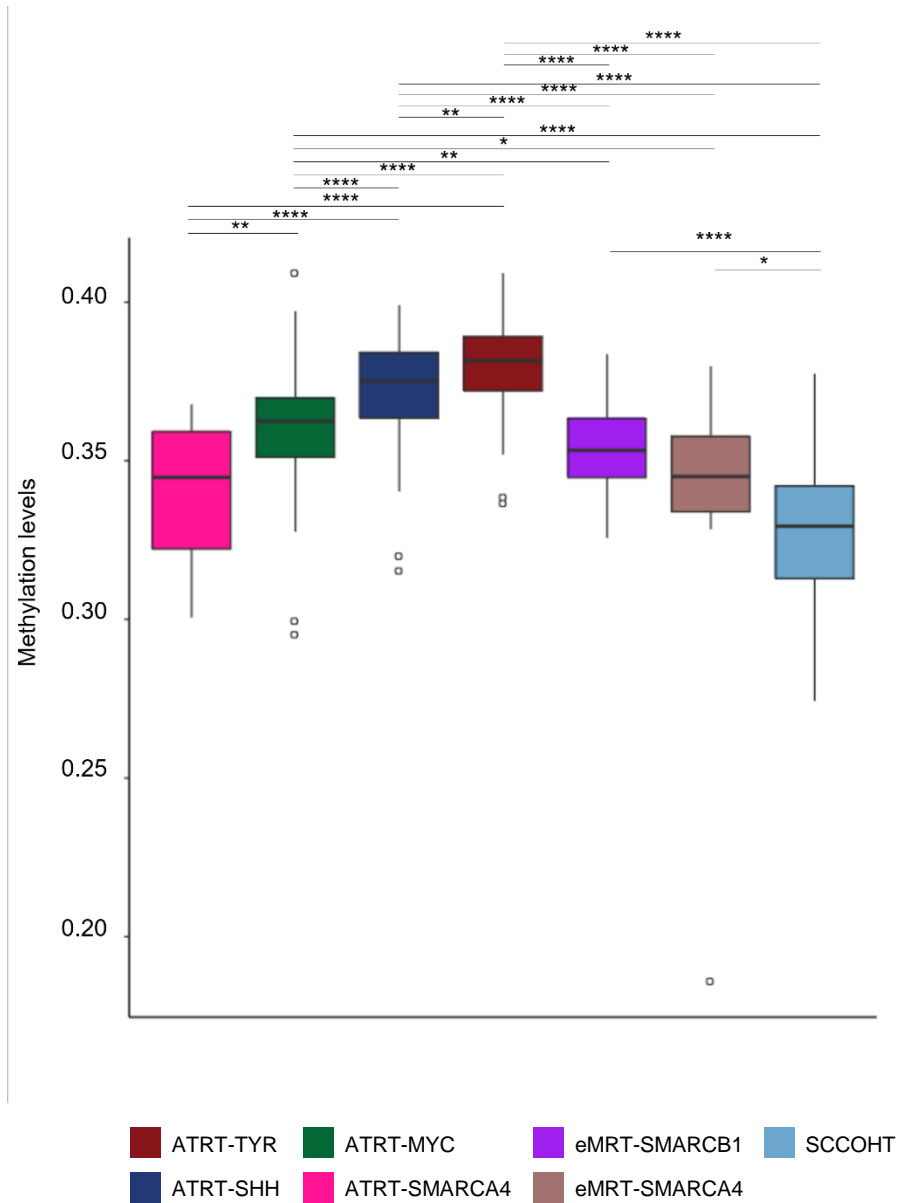

### Supplementary Fig. 3

Genome-wide methylation levels of  $n=14$  ATRT-SMARCA4 (pink),  $n=11$  eMRT-SMARCA4 (brown),  $n=62$  ATRT-TYR (dark red),  $n=93$  ATRT-SHH (blue),  $n=53$  ATRT-MYC (dark green),  $n=74$  eMRT-SMARCB1 (purple), and  $n=28$  SCCOHTs (light blue) are shown as boxplots where the y-axis indicates the  $\beta$  values derived from 450K/850K data. \* $p < 0.05$ , \*\* $p > 0.01$ , \*\*\* $p > 0.001$ , \*\*\*\* $p > 0.0001$ , not significant differences are not indicated.

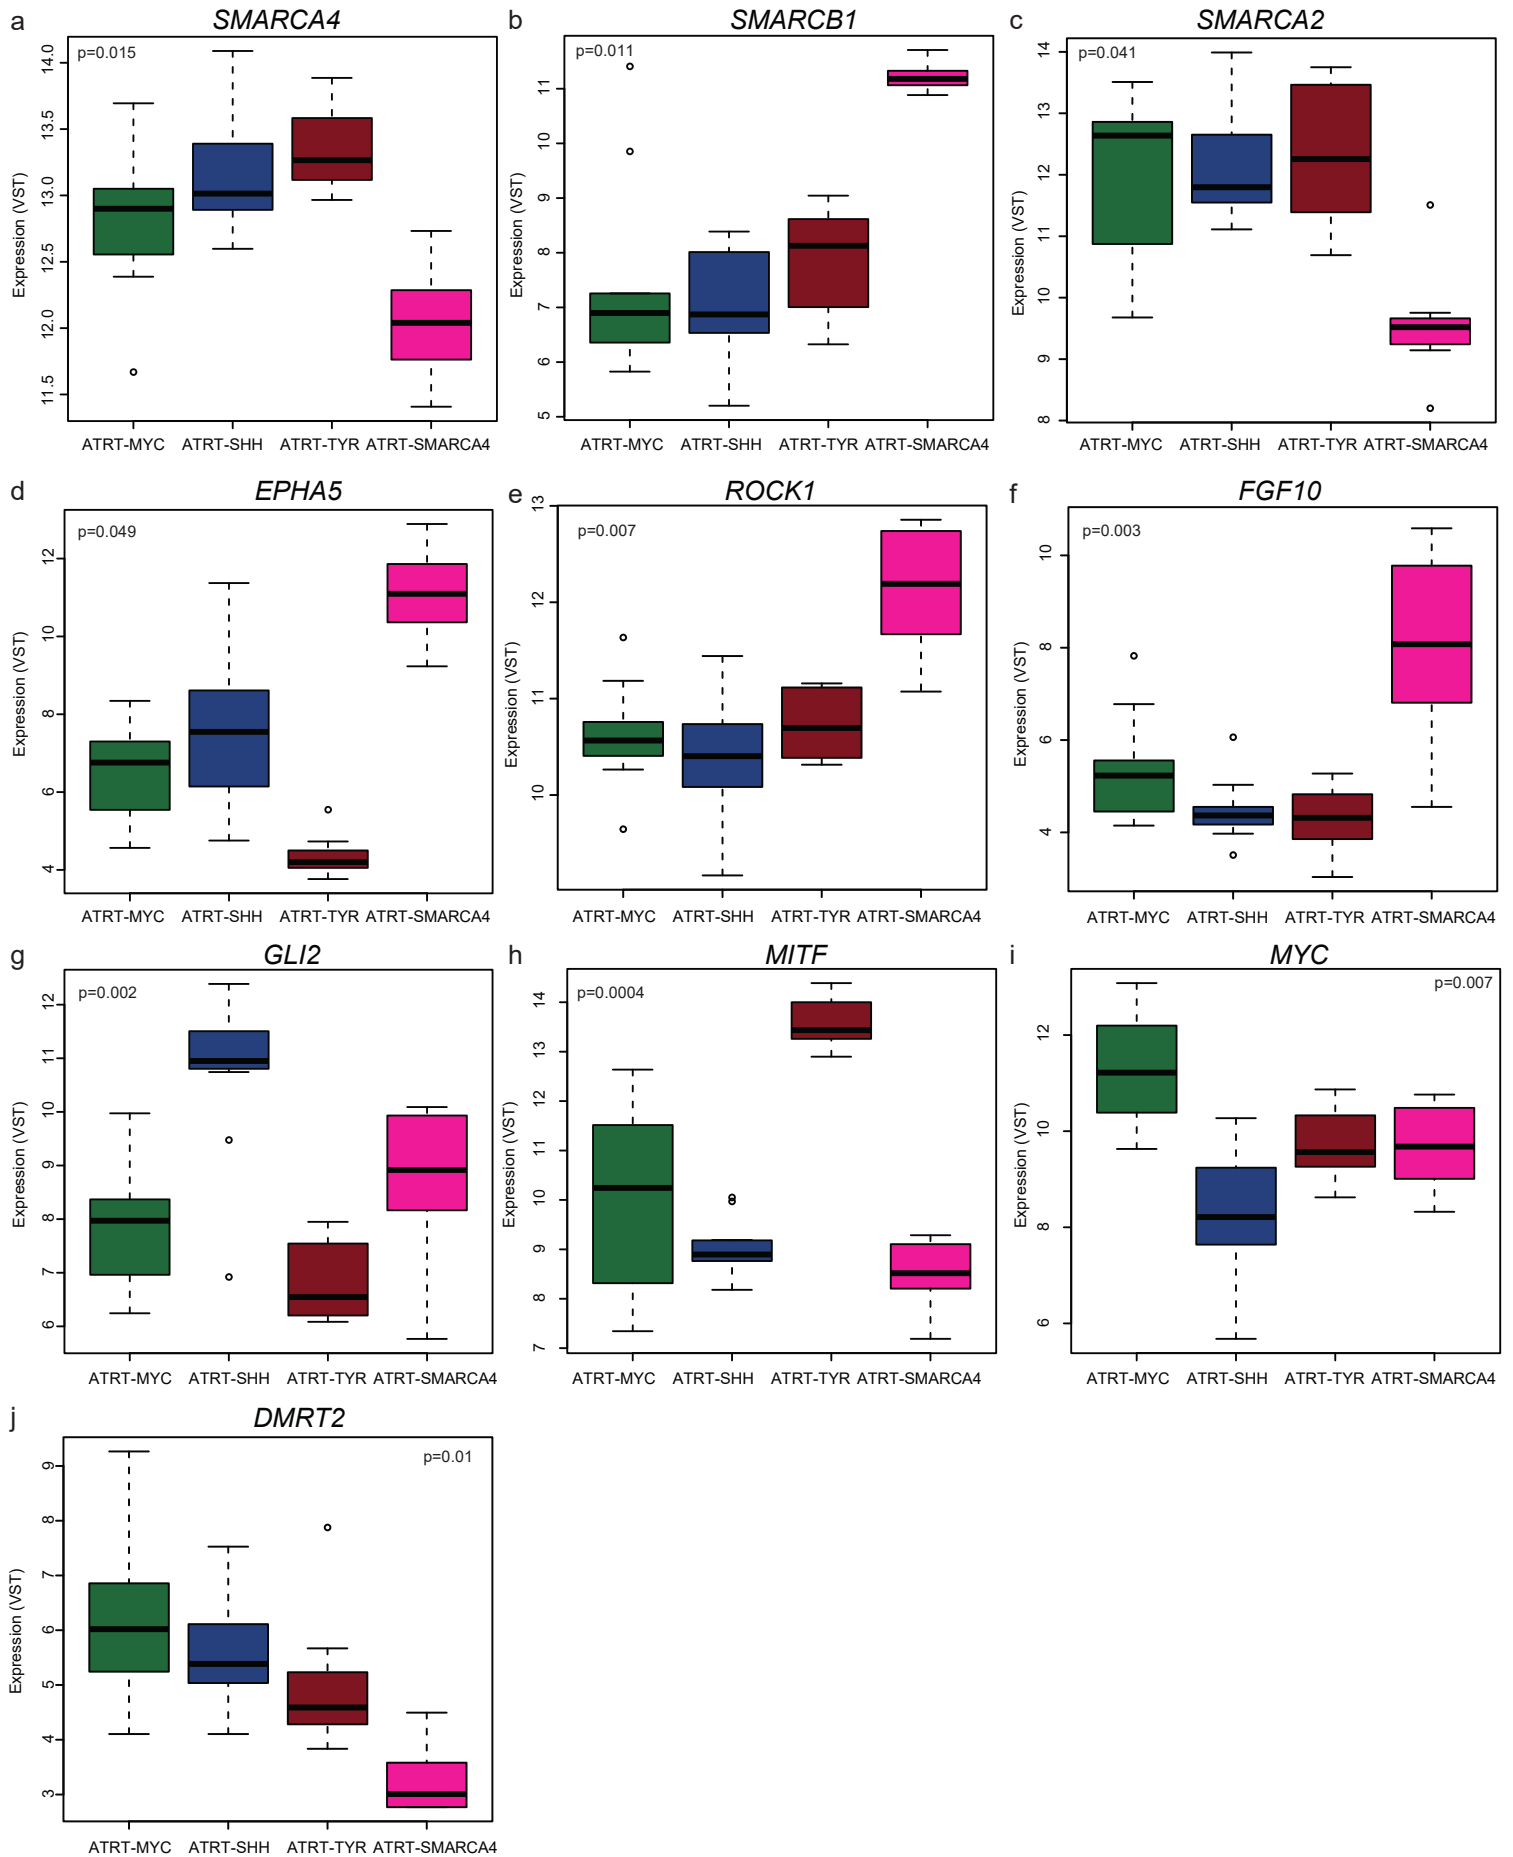**Supplementary Fig. 4**

Relative expression levels of *SMARCA4* (a), *SMARCB1* (b), *SMARCA2* (c), *EPHA5* (d), *ROCK1* (e), *FGF10* (f), *GLI2* (g), *MITF* (h), *MYC* (i), and *DMRT2* (j) in the different ATRT subgroups are displayed as boxplots.

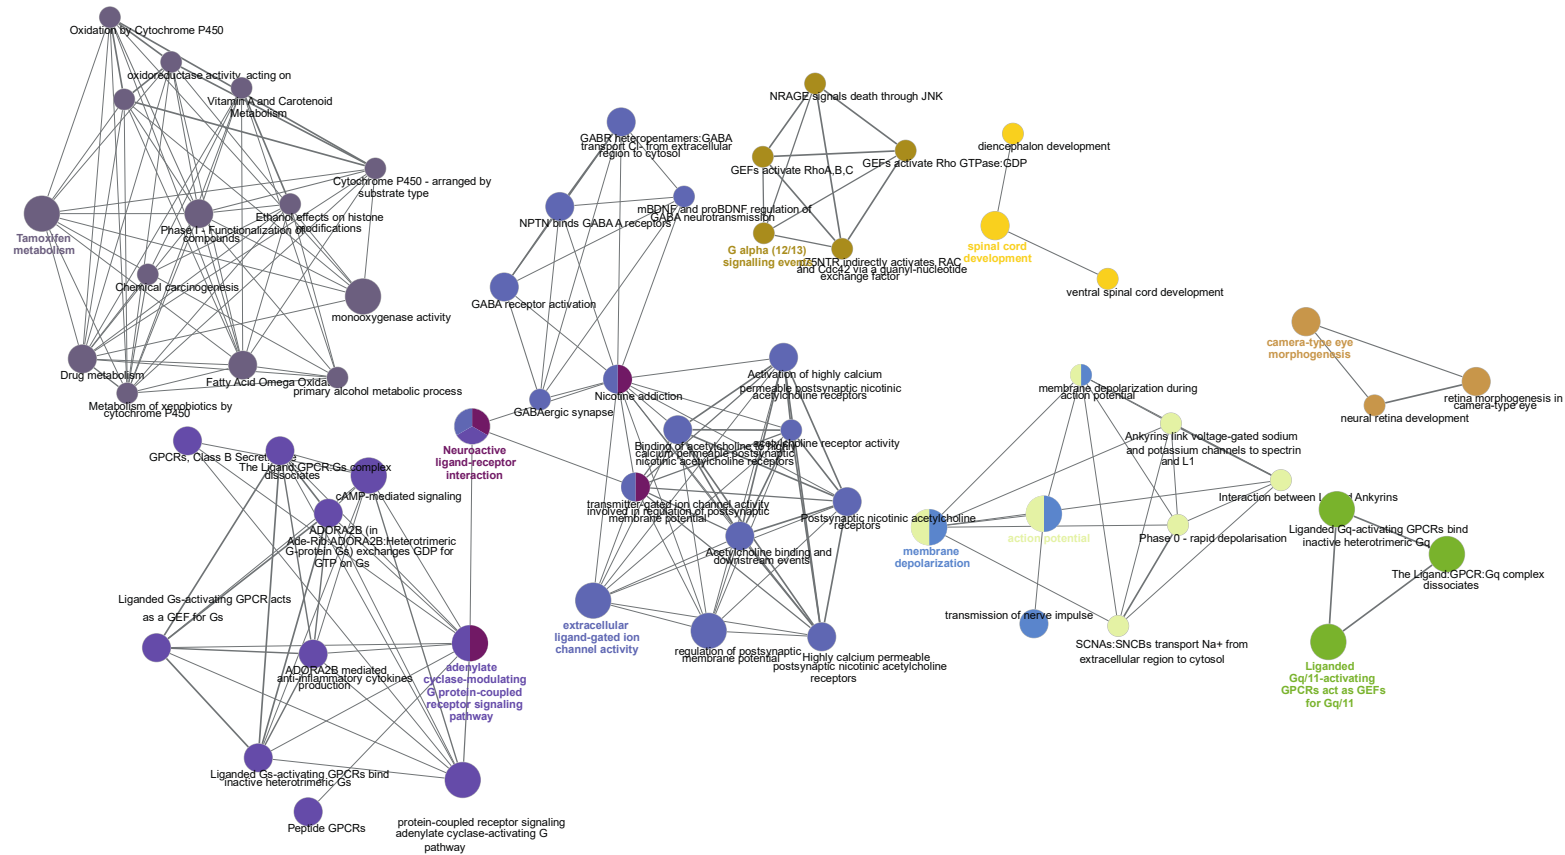

**Supplementary Fig. 5**

Network analysis of enriched terms in in *SMARCA4* mutated ATRTs compared to *SMARCB1* deficient ATRTs are depicted.

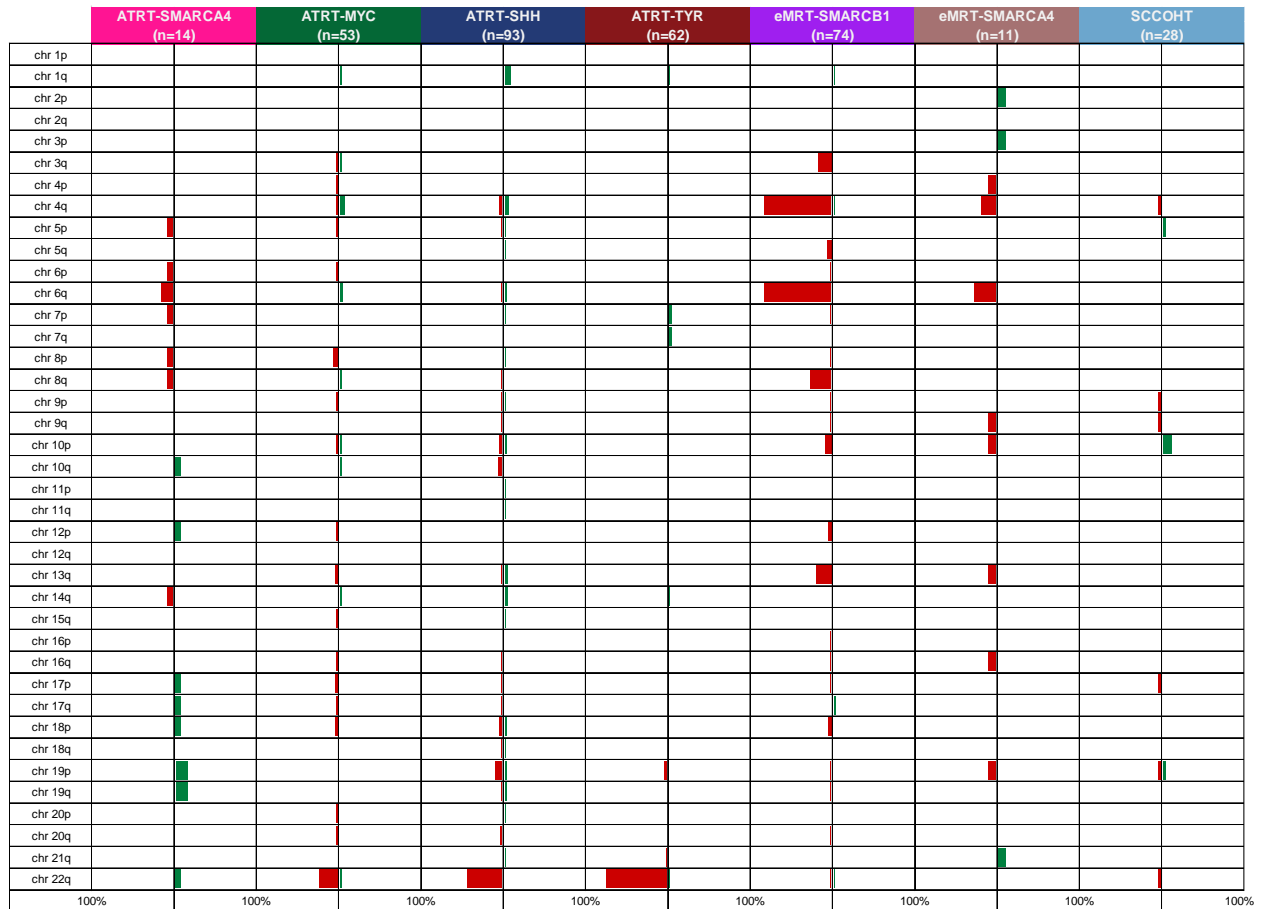

### Supplementary Fig. 6

Overview of chromosomal gains and losses on q and p arms are shown as percentages of ATRT-SMARCA4 (n=14, pink), eMRT-SMARCA4 (n=11, brown), ATRT-TYR (n=62, dark red), ATRT-SHH (n=63, blue), ATRT-MYC (n=53, dark green), eMRT-SMARCB1 (n=74, purple), and SCCOHTs (n=28, light blue) calculated from 450K/850K DNA methylation data.

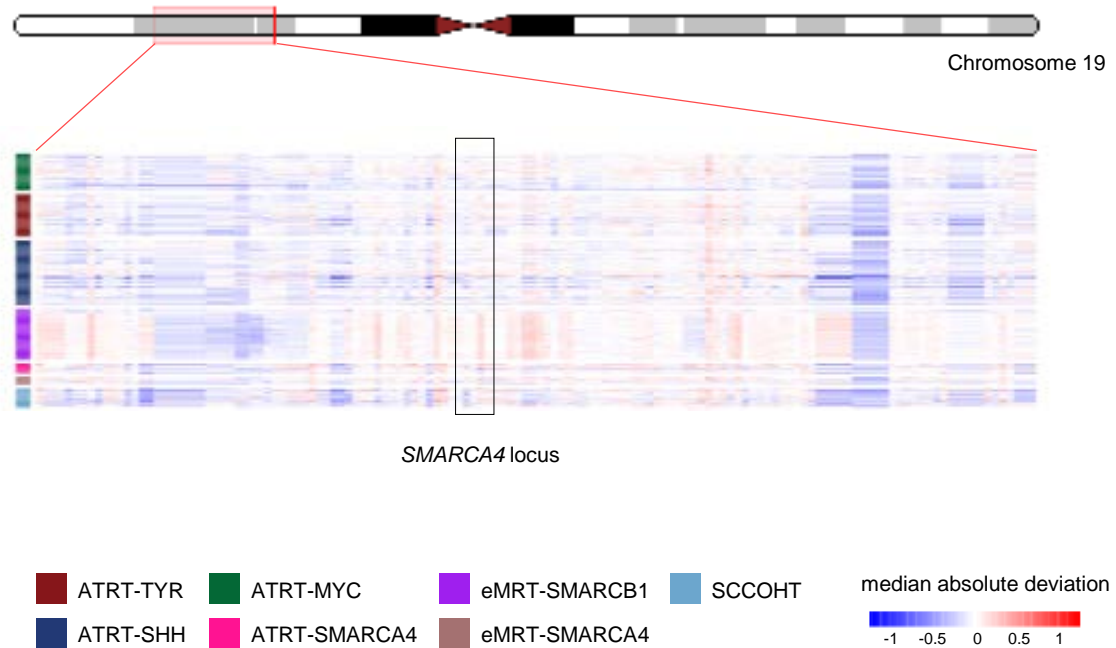

### Supplementary Fig. 7

Chromosomal copy gains (red) and losses (blue) at the *SMARCA4* locus inferred from 450K/850K DNA methylation data of ATRT-*SMARCA4* (n=14, pink), eMRT-*SMARCA4* (n=11, brown), ATRT-TYR (n=62, dark red), ATRT-SHH (n=63, blue), ATRT-MYC (n=53, dark green), eMRT-SMARCB1 (n=74, purple), and SCCOHTs (n=28, light blue) and summarized as a heatmap.



**Supplementary Table 1: Overview of tumor samples used in this study.**

| Type of Analysis              | <i>SMARCA4</i> mutated ATRTs                        | <i>SMARCA4</i> mutated eMRTs       | <i>SMARCA4</i> mutated MBs          | <i>SMARCB1</i> mutated ATRT              | <i>SMARCB1</i> mutated eMRT | <i>SMARCA4</i> wild type MB SCCOHT |                                    |
|-------------------------------|-----------------------------------------------------|------------------------------------|-------------------------------------|------------------------------------------|-----------------------------|------------------------------------|------------------------------------|
| Survival                      | n=11 present study<br>n=4 from [17]<br>n=1 from [2] |                                    |                                     | n=69 from [12]                           |                             |                                    |                                    |
| DNA methylation profiling     | n=14 present study                                  | n=10 present study<br>n=1 from [5] | n=2 present study<br>n=16 from [34] | n=12 present study<br>n=96 from [4,6,47] | n=74 from [6]               | n=367 from [4]                     | n=1 present study<br>n=27 from [8] |
| RNA sequencing                | n=8 present study                                   |                                    |                                     | n=4 present study<br>n=24 from [22]      |                             |                                    |                                    |
| Summary of all ATRT subgroups | n=14 present study<br>n=4 from [17]<br>n=1 from [2] |                                    |                                     | n≤321 from [19]<br>n=75 from [12]        |                             |                                    |                                    |



**Supplementary Table 1: Overview of unpublished SMARCB1 mutated ATRTs included in this study.** infra: infratentorial, n/a, data not available, supra: supratentorial; √ analysis done; x analysis not done

| Case No. | Tumor location | Sex    | Age at diagnosis [months] | Molecular subgroup | DNA methylation data | RNA sequencing data |
|----------|----------------|--------|---------------------------|--------------------|----------------------|---------------------|
| 28       | infra          | male   | 8.4                       | ATRTR-MYC          | √                    | x                   |
| 29       | supra          | male   | 118.8                     | ATRTR-MYC          | √                    | √                   |
| 30       | supra          | male   | 18                        | ATRTR-MYC          | √                    | x                   |
| 31       | supra          | male   | 2.4                       | ATRTR-MYC          | √                    | x                   |
| 32       | supra          | male   | 30                        | ATRTR-MYC          | x                    | √                   |
| 33       | supra          | male   | 38.4                      | ATRTR-SHH          | √                    | x                   |
| 34       | n/a            | female | 15.6                      | ATRTR-SHH          | √                    | x                   |
| 35       | n/a            | male   | 13.2                      | ATRTR-SHH          | √                    | x                   |
| 36       | supra          | male   | 60                        | ATRTR-SHH          | x                    | √                   |
| 37       | infra          | male   | 12                        | ATRTR-TYR          | √                    | x                   |
| 38       | infra          | female | 31.2                      | ATRTR-TYR          | √                    | x                   |
| 39       | supra          | male   | 19.2                      | ATRTR-TYR          | x                    | √                   |
